# Supplementary material for: Gene pathway development in human epicardial adipose tissue during early life
Source: JCI journal article supplement (doi:10.1172/jci.insight.87460), 2016-08-17
Supplement: sd1 [file 1]

**Supplemental Table 1: Participants' clinical conditions and medications**

| <b>Age (years)<sup>a</sup></b> | <b>Gender</b> | <b>Primary Cardiac diagnoses</b>                                                 | <b>Other medical conditions</b> | <b>Regular medications</b>                    |
|--------------------------------|---------------|----------------------------------------------------------------------------------|---------------------------------|-----------------------------------------------|
| 0.01                           | Male          | Transposition of great arteries                                                  | none                            | none                                          |
| 0.01                           | Male          | Truncus arteriosus, pulmonary atresia                                            | none                            | prostaglandin                                 |
| 0.01                           | Female        | Hypoplastic left heart syndrome                                                  | none                            | prostaglandin E2 dobutamine                   |
| 0.02                           | Male          | Hypoplastic left heart syndrome                                                  | none                            | Dobutamine                                    |
| 0.03                           | Female        | Hypoplastic aortic arch                                                          | none                            | Prostaglandin, frusemide, digoxin             |
| 0.03                           | Female        | Transposition of great arteries                                                  | none                            | Frusemide, spironolactone, prostaglandin      |
| 0.03                           | Male          | Transposition of great arteries                                                  | none                            | Prostaglandin                                 |
| 0.05                           | Male          | Transposition of great arteries, ventricular septal defect, atrial septal defect | Prematurity                     | Frusemide, spironolactone                     |
| 0.07                           | Male          | Truncus arteriosus                                                               | Chromosome 8 anomaly            | Frusemide, propranolol                        |
| 0.08                           | Male          | Hypoplastic left heart syndrome                                                  | none                            | none                                          |
| 0.11                           | Male          | Truncus arteriosus, Tetralogy of Fallot                                          | none                            | none                                          |
| 0.12                           | Male          | Ventricular septal defect                                                        | none                            | Frusemide, spironolactone                     |
| 0.15                           | Male          | Ventricular septal defect, aorto-pulmonary valve dysplasia                       | Tracheo-oesophageal fistula     | Frusemide, captopril, ranitidine, domperidone |

|      |        |                                                                                            |                         |                                            |
|------|--------|--------------------------------------------------------------------------------------------|-------------------------|--------------------------------------------|
| 0.25 | Male   | Total anomalous pulmonary venous connections                                               | none                    | Frusemide, propranolol                     |
| 0.27 | Female | Corrected transposition of great arteries                                                  | Atrio-ventricular block | Frusemide, spironolactone                  |
| 0.31 | Male   | Tetralogy of Fallot                                                                        | Prematurity             | Propranolol                                |
| 0.34 | Male   | Tetralogy of Fallot                                                                        | none                    | none                                       |
| 0.41 | Male   | Tetralogy of Fallot                                                                        | none                    | Propranolol                                |
| 0.41 | Male   | Ventricular septal defect                                                                  | none                    | none                                       |
| 0.46 | Male   | Ventricular septal defect, right ventricular outflow tract obstruction                     | none                    | Frusemide, spironolactone                  |
| 0.46 | Male   | Tetralogy of Fallot                                                                        | none                    | Frusemide, spironolactone                  |
| 0.47 | Female | Ventricular septal defect<br>Atrial septal defect                                          | none                    | Frusemide, spironolactone                  |
| 0.47 | Male   | Atrioventricular septal defect                                                             | Trisomy 21              | Frusemide, digoxin, captopril, domperidone |
| 0.48 | Male   | Tetralogy of Fallot                                                                        | none                    | Propranolol                                |
| 0.50 | Female | Atrial septal defect                                                                       | none                    | none                                       |
| 0.58 | Female | Tetralogy of Fallot<br>Left pulmonary artery stenosis                                      | none                    | none                                       |
| 0.59 |        | Pulmonary atresia , Ventricular septal defect<br>Major aorto-pulmonary collateral arteries | 22q deletion            | none                                       |
| 0.64 | Female | Ventricular septal defect                                                                  | none                    | Frusemide, captopril                       |
| 0.67 | Female | Ventricular septal defect                                                                  | none                    | Frusemide, captopril                       |

|       |        |                                                                        |                   |                                                      |
|-------|--------|------------------------------------------------------------------------|-------------------|------------------------------------------------------|
| 0.68  | Male   | Ventricular septal defect                                              | Trisomy 21        | Frusemide, spironolactone                            |
| 0.71  | Female | Tetralogy of Fallot                                                    | none              | Propranolol                                          |
| 0.73  | Male   | Ventricular septal defect, persistent foramen ovale                    | Trisomy 21        | Movicol®                                             |
| 0.80  | Female | Ventricular septal defect                                              | 22q deletion      | Frusemide, captopril                                 |
| 0.82  | Male   | Ventricular septal defect                                              | none              | Frusemide, captopril                                 |
| 0.87  | Male   | Tetralogy of Fallot                                                    | none              | Aspirin                                              |
| 0.90  | Female | Ventricular septal defect                                              | none              | Frusemide, captopril                                 |
| 0.93  | Male   | Pulmonary value stenosis                                               | Noonan's syndrome | none                                                 |
| 0.96  | Female | Right pulmonary artery stenosis                                        | none              | none                                                 |
| 0.99  | Male   | Ventricular septal defect, right ventricular outflow tract obstruction | none              | Frusemide, propranolol                               |
| 2.18  | Male   | Atrial septal defect                                                   | Prematurity       | Frusemide, spironolactone, salbutamol, betamethasone |
| 3.40  | Female | Atrial septal defect                                                   | none              | none                                                 |
| 3.61  | Female | Atrial septal defect                                                   | none              | none                                                 |
| 4.47  | Male   | Ventricular septal defect                                              | none              | Enalapril                                            |
| 6.69  | Male   | Hypertrophic cardiomyopathy                                            | none              | Propranolol                                          |
| 7.15  | Female | Severe right ventricular outflow tract obstruction                     | none              | none                                                 |
| 17.05 | Male   | Partial anomalous pulmonary venous drainage, atrial septal defect      | none              | none                                                 |

<sup>a</sup>Tissue samples were obtained when cardiac surgery was performed for clinical indications in clinically determined random order. Information is presented in age order to maintain anonymisation
